# Supplementary material
Source: Springer Nature journal article supplement (https://www.springermedizin.de/resource/supplementary/12916_2011_484_MOESM1_ESM.pdf/9598146)

AVP

Neurophysin II

Copeptin  
(CT-proAVP)

**1**

**20**

**28**

**32**

**124**

**126**

**164**

signal

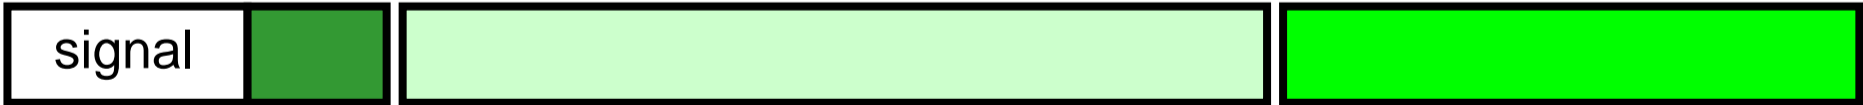

Supplement: MOESM1 [file 9598146]
